# Supplementary material
Source: PubMed Central journal article supplement (PMC2937277)
Supplement: NIHMS227291-supplement-Table_1.pdf [file NIHMS227291-supplement-Table_1.pdf]

Supplementary data

**Supplementary Table 1. Cytokine/chemokine/biomarker profiles in *CCR5*<sup>+/+</sup> and *CCR5*<sup>-/-</sup> mice<sup>§</sup>**

| Parameter*        | units        | LLD <sup>◇</sup> | <i>CCR5</i> <sup>+/+</sup> |             |             |                | <i>CCR5</i> <sup>-/-</sup> |             |             |             | p <sup>△</sup> |
|-------------------|--------------|------------------|----------------------------|-------------|-------------|----------------|----------------------------|-------------|-------------|-------------|----------------|
|                   |              |                  | 1 <sup>•</sup>             | 3           | 5           | median         | 2                          | 4           | 6           | median      |                |
| Apo A1            | ug/mL        | 0.21             | 0.00 <sup>V</sup>          | 0.00        | 0.00        | 0.00           | 0.00                       | 0.00        | 0.011       | 0.00        | 0.3173         |
| CD40              | pg/mL        | 2.4              | 0.00                       | 0.00        | 0.00        | 0.00           | 0.00                       | 0.00        | 0.00        | 0.00        | 0.00           |
| CD40 L            | pg/mL        | 18               | 0.00                       | 0.00        | 0.00        | 0.00           | 0.00                       | 0.00        | 0.00        | 0.00        | .              |
| CRP               | ug/mL        | 0.0042           | 0.0043                     | 0.0035      | 0.0025      | 0.00           | 0.0024                     | 0.0022      | 0.0053      | 0.00        | 0.5127         |
| EGF               | pg/mL        | 7.8              | 3.1                        | 3.4         | 4.0         | 3.42           | 2.8                        | 2.2         | 4.0         | 2.81        | 0.3758         |
| Endothelin-1      | pg/mL        | 13               | 5.9                        | 5.9         | 7.8         | 5.87           | 5.9                        | 5.9         | 6.9         | 5.87        | 0.7963         |
| Eotaxin           | pg/mL        | 2.5              | 1.7                        | 2.4         | 2.5         | 2.41           | 0.95                       | 0.88        | 1.9         | 0.95        | 0.1266         |
| Factor VII        | ng/mL        | 0.19             | 0.76                       | 1.1         | 1.1         | 1.06           | 0.54                       | 0.54        | 0.96        | 0.54        | 0.1157         |
| FGF-9             | ng/mL        | 0.20             | 0.00                       | 0.064       | 0.00        | 0.00           | 0.11                       | 0.00        | 0.00        | 0.00        | 0.7963         |
| FGF-basic         | ng/mL        | 0.12             | 0.70                       | 0.75        | 0.82        | 0.75           | 0.47                       | 0.40        | 0.62        | 0.47        | 0.0495         |
| Fibrinogen        | ug/mL        | 0.85             | 0.42                       | 0.87        | 1.0         | 0.87           | 0.69                       | 0.00        | 1.6         | 0.69        | 0.8273         |
| GCP-2             | ng/mL        | 0.0049           | 0.0014                     | 0.00        | 0.00        | 0.00           | 0.00                       | 0.00        | 0.00        | 0.00        | 0.3173         |
| GM-CSF            | pg/mL        | 1.7              | 32                         | 73          | 63          | 63.00          | 8.5                        | 66          | 26          | 26.00       | 0.2752         |
| GST-alpha         | ng/mL        | 0.084            | 0.00                       | 0.00        | 0.00        | 0.00           | 0.00                       | 0.00        | 0.00        | 0.00        | .              |
| Haptoglobin       | ug/mL        | 0.013            | 0.20                       | 0.22        | 0.16        | 0.20           | 0.20                       | 0.22        | 0.17        | 0.20        | 0.8222         |
| IFN-gamma         | pg/mL        | 14               | 101                        | 207         | 1030        | 207.00         | 14                         | 423         | 202         | 202.00      | 0.5127         |
| IgA               | ug/mL        | 0.038            | 0.15                       | 0.29        | 0.22        | 0.22           | 0.27                       | 0.19        | 0.37        | 0.27        | 0.5127         |
| IL-10             | pg/mL        | 22               | 205                        | 184         | 386         | 205.00         | 111                        | 186         | 162         | 162.00      | 0.1266         |
| IL-11             | pg/mL        | 17               | 5.3                        | 4.1         | 6.5         | 5.32           | 3.0                        | 0.00        | 0.00        | 0.00        | 0.0463         |
| IL-12p70          | ng/mL        | 0.11             | 0.011                      | 0.020       | 0.011       | 0.01           | 0.020                      | 0.011       | 0.011       | 0.01        | 1              |
| IL-17             | ng/mL        | 0.030            | 0.038                      | 0.25        | 0.17        | 0.17           | 0.0021                     | 0.087       | 0.029       | 0.03        | 0.1266         |
| IL-18             | ng/mL        | 0.13             | 0.13                       | 0.24        | 0.19        | 0.19           | 0.13                       | 0.068       | 0.19        | 0.13        | 0.2612         |
| IL-1alpha         | pg/mL        | 9.0              | 24                         | 59          | 59          | 58.80          | 8.1                        | 29          | 31          | 28.50       | 0.2683         |
| IL-1beta          | ng/mL        | 0.089            | 0.92                       | 0.92        | 1.2         | 0.92           | 0.65                       | 0.35        | 1.00        | 0.65        | 0.2683         |
| IL-2              | pg/mL        | 13               | 162                        | 73          | 116         | 116.00         | 12                         | 30          | 26          | 25.90       | 0.0495         |
| IL-3              | pg/mL        | 4.3              | 4.8                        | 7.0         | 12          | 7.02           | 1.3                        | 4.0         | 2.0         | 1.98        | 0.0495         |
| IL-4              | pg/mL        | 15               | 12                         | 20          | 57          | 19.70          | 0.00                       | 42          | 31          | 31.00       | 0.8273         |
| IL-5              | ng/mL        | 0.039            | 0.20                       | 0.31        | 0.39        | 0.31           | 0.064                      | 0.076       | 0.20        | 0.08        | 0.0765         |
| IL-6              | pg/mL        | 2.8              | 5.1                        | 6.8         | 17          | 6.81           | 0.00                       | 4.2         | 2.0         | 1.97        | 0.0495         |
| IL-7              | ng/mL        | 0.062            | 0.016                      | 0.013       | 0.018       | 0.02           | 0.014                      | 0.014       | 0.012       | 0.01        | 0.2683         |
| IP-10             | pg/mL        | 8.1              | 24                         | 30          | 66          | 30.20          | 4.2                        | 23          | 24          | 23.00       | 0.0765         |
| KC/GROalpha       | ng/mL        | 0.035            | 0.00                       | 0.00        | 0.0018      | 0.00           | 0.00                       | 0.00        | 0.00        | 0.00        | 0.3173         |
| LIF               | pg/mL        | 8.7              | 485                        | 368         | 640         | 485.00         | 131                        | 414         | 285         | 285.00      | 0.1266         |
| Lymphotactin      | pg/mL        | 17               | 191                        | 214         | 651         | 214.00         | 81                         | 266         | 264         | 264.00      | 0.8273         |
| MCP-1             | pg/mL        | 3.4              | 0.78                       | 0.62        | 2.9         | 0.78           | 0.53                       | 0.00        | 0.00        | 0.00        | 0.0463         |
| MCP-3             | pg/mL        | 6.3              | 1.2                        | 1.5         | 2.2         | 1.53           | 0.57                       | 0.70        | 1.1         | 0.70        | 0.0495         |
| MCP-5             | pg/mL        | 9.3              | 0.00                       | 0.00        | 0.00        | 0.00           | 0.00                       | 0.00        | 0.00        | 0.00        | .              |
| M-CSF             | ng/mL        | 0.0036           | 0.0071                     | 0.0092      | 0.010       | 0.01           | 0.0028                     | 0.0038      | 0.0069      | 0.00        | 0.0495         |
| MDC               | pg/mL        | 4.4              | 1310                       | 2300        | 3090        | 2300.00        | 664                        | 783         | 1820        | 783.00      | 0.1266         |
| <b>MIP-1alpha</b> | <b>ng/mL</b> | <b>0.045</b>     | <b>0.91</b>                | <b>0.84</b> | <b>3.3</b>  | <b>0.91</b>    | <b>0.23</b>                | <b>1.5</b>  | <b>1.1</b>  | <b>1.14</b> | <b>0.8273</b>  |
| <b>MIP-1beta</b>  | <b>pg/mL</b> | <b>16</b>        | <b>1640</b>                | <b>1220</b> | <b>5290</b> | <b>1640.00</b> | <b>344</b>                 | <b>2370</b> | <b>1720</b> | <b>1720</b> | <b>0.8273</b>  |

|               |              |            |            |            |           |             |             |            |            |             |               |
|---------------|--------------|------------|------------|------------|-----------|-------------|-------------|------------|------------|-------------|---------------|
| MIP-1gamma    | ng/mL        | 0.015      | 0.021      | 0.027      | 0.097     | 0.03        | 0.0072      | 0.013      | 0.014      | 0.01        | 0.0495        |
| MIP-2         | pg/mL        | 1.4        | 5.2        | 16         | 27        | 15.70       | 1.3         | 3.2        | 6.1        | 3.16        | 0.1266        |
| MIP-3beta     | ng/mL        | 0.093      | 0.24       | 0.37       | 0.42      | 0.37        | 0.12        | 0.12       | 0.29       | 0.12        | 0.1212        |
| MMP-9         | ng/mL        | 0.10       | 0.25       | 0.00       | 0.00      | 0.00        | 0.00        | 0.00       | 0.00       | 0.00        | 0.3173        |
| MPO           | ng/mL        | 0.19       | 0.56       | 0.38       | 1.7       | 0.56        | 0.12        | 0.066      | 0.19       | 0.12        | 0.0495        |
| Myoglobin     | ng/mL        | 0.24       | 0.00       | 0.00       | 0.00      | 0.00        | 0.00        | 0.00       | 0.00       | 0.00        | .             |
| OSM           | ng/mL        | 0.026      | 0.024      | 0.026      | 0.030     | 0.03        | 0.022       | 0.022      | 0.023      | 0.02        | 0.0463        |
| <b>RANTES</b> | <b>pg/mL</b> | <b>9.6</b> | <b>2.3</b> | <b>3.6</b> | <b>14</b> | <b>3.59</b> | <b>0.89</b> | <b>2.6</b> | <b>4.3</b> | <b>2.61</b> | <b>0.5127</b> |
| SAP           | ug/mL        | 0.027      | 0.041      | 0.059      | 0.043     | 0.04        | 0.040       | 0.063      | 0.051      | 0.05        | 0.8273        |
| SCF           | pg/mL        | 15         | 9.7        | 12         | 15        | 11.50       | 4.5         | 6.2        | 8.8        | 6.17        | 0.0495        |
| SGOT          | ug/mL        | 0.37       | 0.00       | 0.00       | 1.6       | 0.00        | 3.5         | 1.1        | 0.00       | 1.06        | 0.4867        |
| TIMP-1        | ng/mL        | 0.036      | 0.051      | 0.051      | 0.064     | 0.05        | 0.037       | 0.047      | 0.045      | 0.05        | 0.0463        |
| Tissue Factor | ng/mL        | 0.10       | 0.71       | 1.0        | 1.1       | 1.04        | 0.33        | 0.26       | 0.71       | 0.33        | 0.0765        |
| TNF-alpha     | ng/mL        | 0.027      | 0.050      | 0.034      | 0.073     | 0.05        | 0.00        | 0.043      | 0.024      | 0.02        | 0.1266        |
| TPO           | ng/mL        | 0.53       | 2.1        | 3.0        | 3.7       | 2.99        | 0.67        | 0.67       | 2.3        | 0.67        | 0.1212        |
| VCAM-1        | ng/mL        | 0.19       | 0.00       | 0.068      | 0.080     | 0.07        | 0.00        | 0.034      | 0.00       | 0.00        | 0.2463        |
| VEGF          | pg/mL        | 7.6        | 92         | 52         | 96        | 91.80       | 19          | 61         | 41.9       | 41.90       | 0.1266        |
| vWF           | ng/mL        | 0.99       | 0.00       | 0.00       | 0.00      | 0.00        | 0.00        | 0.00       | 0.00       | 0.00        | .             |

§ Biomarker concentrations were measured in the culture supernatants of purified mouse T cells after 48 hrs of stimulation with anti-CD3/28 Abs. Three mice per CCR5 genotype group were analyzed, and data from each mouse is shown. Data were obtained by Rules Based Medicine, a multi-analyte profile bioassay ([http://www.rulesbasedmedicine.com/services\\_rodent\\_antigen.asp](http://www.rulesbasedmedicine.com/services_rodent_antigen.asp)). The sensitivity of this bioassay is comparable to that from ELISA. Notably, we and others have used this approach previously to establish murine phenotypes at the protein level (1-4).

\*Apo A1 (Apolipoprotein A1); CD40L (CD40 Ligand); CRP (C Reactive Protein); EGF (Epidermal Growth Factor); FGF-9 (Fibroblast Growth Factor-9); FGF-basic (Fibroblast Growth Factor-basic); GCP-2 (Granulocyte Chemotactic Protein-2); GM-CSF (Granulocyte Macrophage-Colony Stimulating Factor); GST-alpha (Glutathione S-Transferase alpha); IFN-gamma (Interferon-gamma); IgA (Immunoglobulin A); IL- (Interleukin-); IP-10 (Inducible Protein-10); KC/GROalpha (Melanoma Growth Stimulatory Activity Protein); LIF (Leukemia Inhibitory Factor); MCP- (Monocyte Chemoattractant Protein-); M-CSF (Macrophage-Colony Stimulating Factor); MDC (Macrophage-Derived Chemokine); MIP- (Macrophage Inflammatory Protein-); MMP-9 (Matrix Metalloproteinase-9); MPO (Myeloperoxidase); OSM (Oncostatin M); RANTES (Regulation Upon Activation, Normal T-Cell Expressed and Secreted); SAP (Serum Amyloid P); SCF (Stem Cell Factor); SGOT (Serum Glutamic-Oxaloacetic Transaminase); TIMP-1 (Tissue Inhibitor of Metalloproteinase Type-1); TNF-alpha (Tumor Necrosis Factor-alpha); TPO (Thrombopoietin); VCAM-1 (Vascular Cell Adhesion Molecule-1); VEGF (Vascular Endothelial Cell Growth Factor); vWF (von Willebrand Factor). **CCR5 ligands are highlighted in yellow.**

◇ The least detectable dose (LDD) was determined as the mean  $\pm$  3 standard deviations of 20 blank readings. Results below the LDD will be more variable than results above the LDD.

• Numbers in this row (1 to 6) correspond to the mouse identification number

^Statistical significance ( $p$  value) for comparison of the median values of  $CCR5^{+/+}$  and  $CCR5^{-/-}$  mice using Mann-Whitney test. Significant differences ( $p < 0.05$ ) are shown in the main text (Table 1).

∇Undetectable levels are shown as zero.

## References

1. Quinones, M. P., H. G. Martinez, F. Jimenez, C. A. Estrada, M. Dudley, O. Willmon, H. Kulkarni, R. L. Reddick, G. Fernandes, W. A. Kuziel, S. K. Ahuja, and S. S. Ahuja. 2007. CC chemokine receptor 5 influences late-stage atherosclerosis. *Atherosclerosis* 195:e92.
2. Stumhofer, J. S., J. S. Silver, A. Laurence, P. M. Porrett, T. H. Harris, L. A. Turka, M. Ernst, C. J. Saris, J. J. O'Shea, and C. A. Hunter. 2007. Interleukins 27 and 6 induce STAT3-mediated T cell production of interleukin 10. *Nat Immunol* 8:1363.
3. Heuer, J. G., T. Zhang, J. Zhao, C. Ding, M. Cramer, K. L. Justen, S. L. Vonderfecht, and S. Na. 2005. Adoptive transfer of in vitro-stimulated CD4+CD25+ regulatory T cells increases bacterial clearance and improves survival in polymicrobial sepsis. *J Immunol* 174:7141.
4. Blumberg, H., H. Dinh, E. S. Trueblood, J. Pretorius, D. Kugler, N. Weng, S. T. Kanaly, J. E. Towne, C. R. Willis, M. K. Kuechle, J. E. Sims, and J. J. Peschon. 2007. Opposing activities of two novel members of the IL-1 ligand family regulate skin inflammation. *J Exp Med* 204:2603.
